# Supplementary material for: Directed Recovery and Molecular Characterization of Antibiotic Resistance Plasmids from Cheese Bacteria
Source: MDPI journal article supplement (doi:10.3390/ijms22157801), 2021-07-21
Supplement: s1 [file s1]

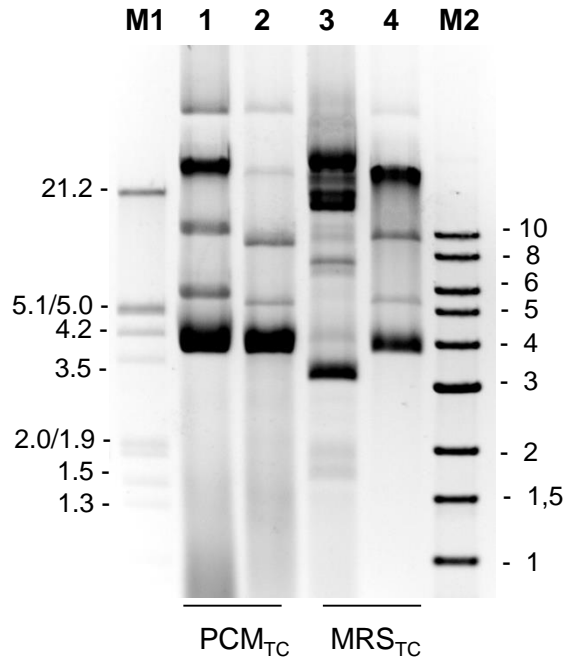

**Figure S1.-** Gel electrophoresis of total plasmid DNA from bacteria recovered in bulk from Plate Count Milk (PCM) and de Man Rogosa and Sharpe (MRS) agar plates supplemented with tetracycline (25 mg mL<sup>-1</sup>) and digested with PstI and XhoI. Lanes: 1, PCM<sub>TC</sub>-3D; 2, PCM<sub>TC</sub>-60D; 3, MRS<sub>TC</sub>-3D; and 4, MRS<sub>TC</sub>-60D. M1, lambda DNA digested with EcoRI and HindIII (kbp), and M2, GRS universal ladder (kbp; GRiSP).

**Table S1.-** Open reading frame (ORF) analysis of tetracycline (pTC1 through pTC7) and erythromycin (pERM1) resistance plasmids of this study recovered after transformation of total plasmid DNA from cheese bacteria into *Lactococcus lactis* NZ9000, *Lactocaseibacillus casei* BL23, and *Lactiplantibacillus plantarum* NC8. Color code of the ORFs: in yellow, genes encoding replication and plasmid maintenance-associated proteins; in green, genes encoding integrases, recombinases, and mobilization-involved proteins; in red, antibiotic resistance genes.

| ORFs                                              | 5' end position | 3' end position <sup>a</sup> | % GC content <sup>b</sup> | No. of aa <sup>c</sup> | Known protein with the highest homology, microorganism/microbial group                     | aa <sup>b</sup> length/total length (% aa identity) | GenBank accession no. |
|---------------------------------------------------|-----------------|------------------------------|---------------------------|------------------------|--------------------------------------------------------------------------------------------|-----------------------------------------------------|-----------------------|
| <b>pTC1 from <i>Lactococcus lactis</i> NZ9000</b> |                 |                              |                           |                        |                                                                                            |                                                     |                       |
| ORF1                                              | 340             | 11,037                       | 37.2                      | 325                    | LPXTG cell wall anchor domain-containing protein, <i>Streptococcus parauberis</i>          | 325/325 (100%)                                      | WP_100190763.1        |
| ΔORF2                                             | 501             | 650                          | 27.3                      | 49                     | Conjugal transfer protein, Multispecies                                                    | 49/67 (100%)                                        | WP_017370349.1        |
| ORF3                                              | 1,479           | 3,419                        | 33.3                      | 646                    | Tetracycline resistance ribosomal protection protein Tet(S), <i>Enterococcus faecium</i>   | 646/646 (100%)                                      | WP_002405437.1        |
| ORF4                                              | 3,693           | 3,514                        | 37.2                      | 56                     | Hypothetical protein/GNAT family N-acetyltransferase, <i>S. parauberis</i>                 | 55/59 (100%)                                        | EMG24350.1            |
| ORF5                                              | 4,256           | 3,669                        | 33.5                      | 195                    | DUF536 domain-containing protein/RepB-like protein, Lactobacillales                        | 195/195 (100%)                                      | WP_003109091.1        |
| ORF6                                              | 5,574           | 4,249                        | 36.9                      | 441                    | RepB family plasmid replication initiator protein, Lactobacillales                         | 441/441(100%)                                       | WP_003109089.1        |
| ORF7                                              | 5,643           | 5,819                        | 28.2                      | 58                     | Hypothetical protein                                                                       |                                                     |                       |
| ORF8                                              | 6,572           | 5,970                        | 32.5                      | 200                    | Cell division protein Fic (MobC2), Lactobacillales                                         | 198/200 (99%)                                       | WP_002395946.1        |
| ORF9                                              | 7,212           | 6,589                        | 37.3                      | 207                    | Mobilization protein, Lactobacillales                                                      | 206/207 (99%)                                       | WP_063282541.1        |
| ORF10                                             | 8,441           | 7,209                        | 40.7                      | 410                    | Relaxase/mobilization nuclease domain-containing protein, <i>Lactococcus piscium</i>       | 408/410 (99%)                                       | WP_097024212.1        |
| ORF11                                             | 8,914           | 8,420                        | 34.7                      | 164                    | Bacterial mobilization protein MobC, <i>Enterococcus faecalis</i>                          | 164/164 (100%)                                      | EFT90172.1            |
| ORF12                                             | 9,014           | 9,301                        | 34.7                      | 95                     | Hypothetical protein, <i>Bacillus licheniformis</i>                                        | 94/95 (99%)                                         | KUL06623.1            |
| ORF13                                             | 9,877           | 9,413                        | 35.9                      | 154                    | Integrase/recombinase plasmid associated, <i>Lactococcus lactis</i> subsp. <i>cremoris</i> | 154/154 (100%)                                      | ARE24744.1            |
| ORF14                                             | 10,202          | 9,906                        | 24.9                      | 98                     | DUF4298 domain-containing protein, Bacilli                                                 | 98/98 (100%)                                        | WP_003331352.1        |
| ORF15                                             | 10,576          | 10,409                       | 26.7                      | 55                     | Hypothetical protein                                                                       |                                                     |                       |
| ORF16                                             | 10,685          | 10,563                       | 31.70                     | 40                     | Hypothetical protein, <i>L. lactis</i> subsp. <i>lactis</i>                                | 40/40(100%)                                         | ADZ65061.1            |
| <b>pTC2 from <i>Lactococcus lactis</i> NZ9000</b> |                 |                              |                           |                        |                                                                                            |                                                     |                       |
| ORF1                                              | 565             | 10,557                       | 36.24                     | 400                    | BspA family leucine-rich repeat surface protein, <i>Streptococcus parauberis</i>           | 400/400 (100%)                                      | WP_081247919.1        |
| ΔORF2                                             | 651             | 800                          | 27.33                     | 49                     | Conjugal transfer protein, Multispecies                                                    | 49/67 (100%)                                        | WP_017370349.1        |
| ORF3                                              | 1,629           | 3,569                        | 33.33                     | 646                    | Tetracycline resistance ribosomal protection protein Tet(S), <i>Enterococcus faecium</i>   | 646/646 (100%)                                      | WP_002405437.1        |
| ORF4                                              | 3,831           | 3,664                        | 37.22                     | 56                     | Hypothetical protein/GNAT family N-acetyltransferase, <i>S. parauberis</i>                 | 55/59 (100%)                                        | EMG24350.1            |
| ORF5                                              | 4,406           | 3,819                        | 33.50                     | 195                    | DUF536 domain-containing protein/RepB-like protein, Lactobacillales                        | 195/195 (100%)                                      | WP_003109091.1        |

|                                                   |        |        |       |     |                                                                                                          |                |                |
|---------------------------------------------------|--------|--------|-------|-----|----------------------------------------------------------------------------------------------------------|----------------|----------------|
| ORF6                                              | 5,724  | 4,399  | 36.95 | 441 | RepB family plasmid replication initiator protein, <i>Lactobacillales</i>                                | 441/441 (100%) | WP_003109089.1 |
| ORF7                                              | 5,793  | 5,966  | 28.24 | 58  | Hypothetical protein                                                                                     |                |                |
| ORF8                                              | 6,722  | 6,120  | 32.50 | 200 | Cell division protein Fic (MobC2), <i>Lactobacillales</i>                                                | 198/200 (99%)  | WP_002395946.1 |
| ORF9                                              | 7,362  | 6,739  | 37.33 | 207 | Mobilization protein, <i>Lactobacillales</i>                                                             | 206/207 (99%)  | WP_063282541.1 |
| ORF10                                             | 8,591  | 7,359  | 40.79 | 410 | Relaxase/mobilization nuclease domain-containing protein, <i>Lactococcus piscium</i>                     | 408/410 (99%)  | WP_097024212.1 |
| ORF11                                             | 9,064  | 8,570  | 34.74 | 164 | Bacterial mobilization protein MobC, <i>Enterococcus faecalis</i>                                        | 164/164 (100%) | EFT90172.1     |
| ORF12                                             | 9,171  | 9,374  | 33.81 | 68  | Hypothetical protein, <i>Lactococcus lactis</i>                                                          | 58/94 (89%)    | WP_101913476.1 |
| ORF13                                             | 10,202 | 9,633  | 35.43 | 189 | Site-specific recombinase, <i>L. lactis</i> subsp. <i>cremoris</i>                                       | 189/189 (100%) | AFK83769.1     |
| ORF14                                             | 10,370 | 10,224 | 25.17 | 48  | Hypothetical protein                                                                                     |                |                |
| <b>pTC3 from <i>Lactococcus lactis</i> NZ9000</b> |        |        |       |     |                                                                                                          |                |                |
| ORF1                                              | 273    | 854    | 26.2  | 193 | Hypothetical protein, <i>Lactococcus lactis</i>                                                          | 192/193 (99%)  | WP_012898732.1 |
| ORF2                                              | 940    | 1,200  | 33.7  | 86  | Hypothetical protein, <i>L. lactis</i>                                                                   | 86/86 (100%)   | WP_010891647.1 |
| ORF3                                              | 1,294  | 2,205  | 42.8  | 303 | Magnesium transporter CorA family protein, <i>L. lactis</i>                                              | 303/303 (100%) | WP_010891392.1 |
| ORF4                                              | 2,375  | 2,537  | 36.4  | 53  | Putative integrase/recombinase plasmid associated, <i>L. lactis</i>                                      | 53/53 (100%)   | WP_002411279.1 |
| ORF5                                              | 2,664  | 2,987  | 34.2  | 107 | Cytochrome B, <i>Lactobacillales</i>                                                                     | 103/107 (96%)  | WP_167545038.1 |
| ORF6                                              | 3,653  | 3,931  | 26.1  | 92  | Hypothetical protein, <i>L. lactis</i> subsp. <i>lactis</i>                                              | 79/92 (86%)    | ARE02361.1     |
| ORF7                                              | 4,009  | 5,169  | 34.9  | 386 | RepB family plasmid replication initiator protein, <i>L. lactis</i>                                      | 385/386 (99%)  | WP_138406205.1 |
| ORF8                                              | 5,162  | 5,788  | 31.5  | 208 | Replication-associated protein/DUF536 domain-containing protein, <i>L. lactis</i> subsp. <i>cremoris</i> | 183/208 (100%) | WP_015062857.1 |
| ORF9                                              | 5,797  | 6,027  | 33.3  | 76  | Replication-associated protein RepC, <i>L. lactis</i>                                                    | 76/76 (100%)   | WP_010868915.1 |
| ORF10                                             | 6,481  | 6,604  | 30.0  | 40  | Hypothetical protein, <i>L. lactis</i> subsp. <i>lactis</i> biovar. <i>diacetylactis</i>                 | 37/40 (93%)    | AVR65363.1     |
| ΔORF11                                            | 6,684  | 7,079  | 26.5  | 131 | Mobilization protein MobC, <i>L. lactis</i> subsp. <i>lactis</i> biovar. <i>diacetylactis</i>            | 127/160 (97%)  | QEX47727.1     |
| ORF12                                             | 7,815  | 8,993  | 33.6  | 392 | RepB family plasmid replication initiator protein, <i>L. lactis</i>                                      | 392/392 (100%) | WP_046781145.1 |
| ORF13                                             | 8,990  | 9,631  | 31.3  | 213 | DUF536 domain-containing protein, <i>L. lactis</i>                                                       | 213/223 (96%)  | WP_143460173.1 |
| ORF14                                             | 9,640  | 10,140 | 35.5  | 166 | Hypothetical protein, <i>L. lactis</i> subsp. <i>lactis</i>                                              | 166/166 (100%) | KHE75756.1     |
| ORF15                                             | 10,145 | 10,468 | 29.9  | 107 | Hypothetical protein, <i>L. lactis</i>                                                                   | 106/107 (99%)  | WP_010890673.1 |
| ORF16                                             | 11,772 | 11,086 | 37.5  | 228 | IS6-like element IS1216 family transposase, Bacteria                                                     | 227/228 (99%)  | WP_002354485.1 |
| ORF17                                             | 11,850 | 12,054 | 27.9  | 67  | Conjugal transfer protein, Multispecies                                                                  | 67/67 (100%)   | WP_017370349.1 |
| ORF18                                             | 12,882 | 14,822 | 33.3  | 646 | Tetracycline resistance ribosomal protection protein Tet(S), <i>Enterococcus faecium</i>                 | 646/646 (100%) | ABB97394.1     |
| ORF19                                             | 14,910 | 15,078 | 35.1  | 55  | Conjugal transfer protein, Bacilli                                                                       | 54/55 (98%)    | WP_005228365.1 |
| ORF20                                             | 15,208 | 15,097 | 29.8  | 37  | Hypothetical protein, <i>Enterococcus faecium</i>                                                        | 37/37 (100%)   | ADA62734.1     |
| ORF21                                             | 15,950 | 15,592 | 36.1  | 119 | Helix-turn-helix domain-containing protein/Tn916 transcriptional regulator, Bacilli                      | 119/119 (100%) | WP_002405438.1 |

|                                                   |        |        |      |     |                                                                                       |                |                |
|---------------------------------------------------|--------|--------|------|-----|---------------------------------------------------------------------------------------|----------------|----------------|
| ORF22                                             | 16,206 | 16,475 | 30.0 | 89  | Hypothetical protein, <i>E. faecalis</i>                                              | 88/89 (99%)    | AEF32547.1     |
| ORF23                                             | 16,426 | 16,656 | 37.7 | 76  | Hypothetical protein, <i>L. lactis</i>                                                | 76/76 (100%)   | WP_011997529.1 |
| ORF24                                             | 17,394 | 16,708 | 37.4 | 228 | IS6-like element, IS1216 family transposase, Firmicutes                               | 227/228 (99%)  | WP_002377886.1 |
| ΔORF25                                            | 17,587 | 17,897 | 26.0 | 103 | Replication initiation protein, partial, <i>E. faecium</i>                            | 103/103 (100%) | ELB42280.1     |
| ORF26                                             | 18,033 | 18,680 | 24.0 | 215 | Type A-8 chloramphenicol O-acetyltransferase, Lactobacillales                         | 215/215 (100%) | WP_002403315.1 |
| ORF27                                             | 18,932 | 20,144 | 35.0 | 403 | Plasmid recombination enzyme, Lactobacillales                                         | 403/403 (100%) | WP_002328823.1 |
| ΔORF28                                            | 20,480 | 20,313 | 46.7 | 71  | IS3 family transposase, <i>Enterococcus</i>                                           | 64/255 (90%)   | WP_096541189.1 |
| ORF29                                             | 20,687 | 20,831 | 39.5 | 47  | Hypothetical protein, <i>E. faecalis</i>                                              | 46/47 (98%)    | EOF23773.1     |
| ΔORF30                                            | 20,842 | 21,682 | 31.1 | 279 | Replication initiation protein, <i>Staphylococcus</i>                                 | 278/3147 (99%) | WP_071561775.1 |
| ORF31                                             | 21,689 | 22,537 | 24.7 | 282 | Streptomycin adenyltransferase Str, Bacteria                                          | 282/282 (100%) | WP_010711054.1 |
| ORF32                                             | 23,442 | 22,756 | 37.2 | 228 | IS6-like element, IS1216 family transposase, Firmicutes                               | 227/228 (99%)  | WP_002377886.1 |
| ΔORF33                                            | 23,496 | 23,774 | 36.9 | 92  | Type I restriction-modification system, HsdM, <i>L. lactis</i> subsp. <i>cremoris</i> | 86/184 (95%)   |                |
| ORF34                                             | 23,758 | 200    | 33.3 | 408 | Type I restriction-modification system, HsdS, <i>Lactococcus raffinolactis</i>        | 312/412 (75%)  | WP_096040584.1 |
| <b>pTC4 from <i>Lactococcus lactis</i> NZ9000</b> |        |        |      |     |                                                                                       |                |                |
| ORF1                                              | 340    | 41831  | 30.6 | 275 | Hypothetical protein, <i>Lactococcus lactis</i>                                       | 275/275 (100%) | WP_010890676.1 |
| ORF2                                              | 681    | 337    | 31.8 | 114 | PadR family transcriptional regulator, <i>L. lactis</i>                               | 113/114 (99%)  | WP_010890649.1 |
| ΔORF3                                             | 985    | 1,443  | 38.9 | 152 | IS6-like element ISTeha2 family transposase, partial, Lactobacillales                 | 152/226 (100%) | WP_003106709.1 |
| ORF4                                              | 1,743  | 1,934  | 32.2 | 63  | Hypothetical protein                                                                  |                |                |
| ORF5                                              | 2,118  | 2,306  | 31.2 | 61  | Putative role in replication, <i>L. lactis</i> subsp. <i>lactis</i>                   | 61/62 (100%)   | KSU18016.1     |
| ORF6                                              | 2,462  | 2,286  | 30.5 | 58  | Hypothetical protein                                                                  |                |                |
| ORF7                                              | 2,556  | 2,693  | 36.2 | 45  | Lactococcin family bacteriocin, <i>Lactococcus</i>                                    | 30/45 (68%)    | WP_081042642.1 |
| ORF8                                              | 2,706  | 3,417  | 25.7 | 235 | CPBP family intramembrane metallo-endoprotease, <i>Lactococcus</i>                    | 186/236 (79%)  | WP_058208202.1 |
| ORF9                                              | 5,584  | 3,542  | 30.2 | 680 | MobA/MobL family protein, <i>L. lactis</i>                                            | 676/680 (99%)  | WP_010890626.1 |
| ORF10                                             | 5,853  | 6,137  | 21.4 | 94  | Hypothetical protein, <i>L. lactis</i>                                                | 94/94 (100%)   | WP_052206610.1 |
| ORF11                                             | 6,150  | 6,416  | 19.4 | 88  | Hypothetical protein, <i>L. lactis</i>                                                | 88/88 (100%)   | WP_058218801.1 |
| ORF12                                             | 6,905  | 6,705  | 18.9 | 66  | Hypothetical protein, <i>L. lactis</i>                                                | 65/66 (98%)    | WP_058147838.1 |
| ORF13                                             | 7,281  | 6,919  | 29.7 | 120 | Hypothetical protein, <i>L. lactis</i>                                                | 101/118 (95%)  | WP_010890683.1 |
| ORF14                                             | 7,496  | 7,347  | 37.3 | 49  | Hypothetical protein                                                                  |                |                |
| ORF15                                             | 8,883  | 7,714  | 34.1 | 389 | RepB family plasmid replication initiator protein, <i>L. lactis</i>                   | 389/389 (100%) | WP_058218799.1 |
| ORF16                                             | 10,499 | 9,555  | 28.8 | 314 | Toprim domain-containing protein, <i>L. lactis</i>                                    | 314/314 (100%) | WP_011997519.1 |
| ORF17                                             | 10,905 | 10,525 | 30.4 | 126 | Single-stranded DNA-binding protein, <i>Lactococcus</i>                               | 126/126 (100%) | WP_010890681.1 |
| ORF18                                             | 11,285 | 10,920 | 28.6 | 121 | Hypothetical protein, <i>Lactococcus</i>                                              | 121/121 (100%) | WP_011997518.1 |
| ORF19                                             | 11,652 | 11,353 | 27.6 | 99  | Hypothetical protein, <i>Lactococcus</i>                                              | 99/99 (100%)   | WP_011997517.1 |
| ORF20                                             | 12,422 | 11,655 | 27.8 | 255 | ParA family protein, <i>L. lactis</i>                                                 | 255/255 (100%) | WP_011997516.1 |
| ORF21                                             | 13,082 | 12,510 | 28.9 | 190 | Recombinase family protein, <i>L. hircilactis</i>                                     | 190/190 (100%) | WP_153497015.1 |

|        |        |        |      |     |                                                                                          |                |                |
|--------|--------|--------|------|-----|------------------------------------------------------------------------------------------|----------------|----------------|
| ORF22  | 13,281 | 13,523 | 27.1 | 80  | Helix-turn-helix transcriptional regulator, Xre family, <i>L. lactis</i>                 | 80/80 (100%)   | WP_101944591.1 |
| ORF23  | 13,510 | 13,917 | 33.0 | 135 | ATP-dependent helicase, <i>Listeria monocytogenes</i>                                    | 116/128 (96%)  | EAD8123299.1   |
| ORF24  | 14,244 | 14,513 | 30.0 | 89  | Hypothetical protein, <i>Enterococcus faecalis</i>                                       | 88/89 (99%)    | AEF32547.1     |
| ORF25  | 14,515 | 14,694 | 36.6 | 59  | DNA-binding protein, <i>L. lactis</i> subsp. <i>lactis</i>                               | 59/59 (100%)   | ARE12296.1     |
| ORF26  | 15,434 | 14,748 | 37.7 | 228 | IS6-like element, IS1216 family transposase, Bacilli                                     | 228/228 (100%) | WP_031942290.1 |
| ΔORF27 | 15,512 | 15,715 | 27.9 | 67  | Conjugal transfer protein, <i>Lactococcus</i>                                            | 67/81 (100%)   | WP_012358612.1 |
| ORF28  | 16,544 | 18,484 | 33.3 | 646 | Tetracycline resistance ribosomal protection protein Tet(S), <i>Enterococcus faecium</i> | 646/646 (100%) | ABB97394.1     |
| ORF29  | 19,612 | 19,253 | 36.1 | 119 | Helix-turn-helix domain-containing protein/Tn916, transcriptional regulator, Bacilli     | 119/119 (100%) | WP_002405438.1 |
| ORF30  | 19,869 | 20,138 | 30.0 | 89  | Hypothetical protein, <i>E. faecalis</i>                                                 | 88/89 (99%)    | AEF32547.1     |
| ΔORF31 | 20,140 | 20,319 | 36.6 | 59  | Sigma-70 family RNA polymerase sigma factor, Lactobacillales                             | 59/140 (100%)  | WP_010774560.1 |
| ΔORF32 | 20,897 | 20,373 | 37.5 | 174 | IS6-like element, IS1216 family transposase, partial, <i>Enterococcus faecium</i>        | 168/170 (99%)  | WP_085842503.1 |
| ΔORF33 | 21,048 | 20,854 | 31.7 | 64  | IS6-like element, IS1216 family transposase, partial, <i>L. lactis</i>                   | 58/239 (97%)   | WP_060416618.1 |
| ORF34  | 21,539 | 22,450 | 28.1 | 303 | MarR family transcriptional regulator, <i>Lactococcus</i>                                | 302/303 (99%)  | WP_060416617.1 |
| ORF35  | 22,960 | 23,511 | 35.6 | 183 | Recombinase family protein, <i>L. lactis</i>                                             | 181/183 (99%)  | WP_046780955.1 |
| ORF36  | 24,916 | 23,651 | 29.1 | 421 | Hypothetical protein/ABC permease, <i>L. lactis</i>                                      | 421/421 (100%) | KEY61407.1     |
| ORF37  | 25,808 | 24,924 | 32.0 | 294 | ABC transporter ATP-binding protein, <i>L. lactis</i>                                    | 293/294 (99%)  | WP_042748911.1 |
| ORF38  | 26,176 | 25,811 | 32.7 | 121 | GntR family transcriptional regulator, <i>L. lactis</i>                                  | 121/121 (100%) | WP_017864521.1 |
| ORF39  | 28,539 | 26,581 | 36.8 | 652 | CAP domain-containing protein, <i>L. lactis</i>                                          | 635/652 (97%)  | WP_134798152.1 |
| ORF40  | 28,734 | 29,768 | 37.2 | 344 | C39 family peptidase, <i>L. lactis</i>                                                   | 331/344 (100%) | WP_046781133.1 |
| ORF41  | 29,792 | 31,012 | 36.7 | 406 | Hypothetical protein, <i>L. lactis</i> subsp. <i>cremoris</i>                            | 405/406 (99%)  | KKW74469.1     |
| ORF42  | 31,763 | 31,083 | 38.4 | 226 | IS6 family transposase, <i>L. lactis</i>                                                 | 218/226 (96%)  | WP_081196212.1 |
| ΔORF43 | 32,292 | 32,495 | 39.2 | 67  | RepB family plasmid replication initiator protein, partial, <i>L. lactis</i>             | 65/94 (97%)    | WP_032946768.1 |
| ORF44  | 32,492 | 33,206 | 33.0 | 237 | Hypothetical protein, <i>L. lactis</i>                                                   | 222/237 (94%)  | WP_063284114.1 |
| ΔORF45 | 33,505 | 33,834 | 29.0 | 109 | C40 family peptidase, <i>L. lactis</i>                                                   | 103/320 (100%) | WP_052750609.1 |
| ΔORF46 | 33,827 | 34,621 | 37.6 | 264 | C40 family peptidase, <i>L. lactis</i>                                                   | 264/371 (100%) | WP_015063492.1 |
| ORF47  | 34,635 | 35,156 | 35.8 | 173 | Hypothetical protein, <i>L. lactis</i>                                                   | 172/173 (99%)  | WP_015063491.1 |
| ORF48  | 36,113 | 35,427 | 37.4 | 228 | IS6-like element, IS1216 family transposase, <i>E. faecium</i>                           | 227/228 (99%)  | WP_013558432.1 |
| ORF49  | 36,862 | 36,641 | 35.1 | 73  | Hypothetical protein, <i>L. lactis</i>                                                   | 72/73 (99%)    | WP_167593811.1 |
| ORF50  | 37,193 | 36,897 | 32.9 | 98  | Hypothetical protein, <i>Lactococcus</i>                                                 | 98/98 (100%)   | WP_003132842.1 |
| ORF51  | 37,481 | 37,729 | 37.7 | 82  | Lactococcin family bacteriocin, <i>L. lactis</i>                                         | 82/82 (100%)   | WP_081041441.1 |
| ORF52  | 37,731 | 38,012 | 30.1 | 93  | Hypothetical protein, <i>L. lactis</i>                                                   | 92/93 (99%)    | WP_011117207.1 |
| ΔORF53 | 38,707 | 38,198 | 27.8 | 170 | CPBP family intramembrane metallo-endoprotease, <i>L. lactis</i>                         | 169/219 (99%)  | WP_021215271.1 |
| ORF54  | 39,261 | 38,809 | 27.5 | 150 | Hypothetical protein, <i>L. lactis</i>                                                   | 149/150 (99%)  | WP_058224044.1 |
| ORF55  | 40,243 | 39,563 | 38.7 | 226 | IS6 family transposase, <i>L. lactis</i>                                                 | 225/226 (99%)  | WP_096816700.1 |

|                                                   |        |        |      |     |                                                                                       |                |                |
|---------------------------------------------------|--------|--------|------|-----|---------------------------------------------------------------------------------------|----------------|----------------|
| ORF56                                             | 40,400 | 40,549 | 34.0 | 49  | Lactococcin family bacteriocin, <i>Lactococcus</i>                                    | 49/49 (100%)   | WP_017865277.1 |
| ΔORF57                                            | 40,735 | 41,364 | 29.0 | 209 | CPBP family intramembrane metalloprotease, <i>L. lactis</i>                           | 209/234 (100%) | WP_017865276.1 |
| ΔORF58                                            | 41,694 | 41,428 | 38.5 | 88  | Transposase of IS946V, partial, <i>L. lactis</i> subsp. <i>lactis</i>                 | 79/167 (99%)   | SBW31913.1     |
| <b>pTC5 from <i>Lactococcus lactis</i> NZ9000</b> |        |        |      |     |                                                                                       |                |                |
| ORF1                                              | 340    | 31003  | 30.7 | 275 | Hypothetical protein, <i>Lactococcus lactis</i>                                       | 275/275 (100%) | WP_010890676.1 |
| ORF2                                              | 681    | 337    | 31.8 | 114 | PadR family transcriptional regulator, <i>L. lactis</i>                               | 113/114 (99%)  | WP_010890649.1 |
| ΔORF3                                             | 985    | 1,443  | 38.9 | 152 | IS6-like element ISTeha2 family transposase, Lactobacillae                            | 152/226 (100%) | WP_003106709.1 |
| ORF4                                              | 1,466  | 1,624  | 23.8 | 52  | Hypothetical protein                                                                  |                |                |
| ORF5                                              | 2,507  | 2,286  | 27.4 | 73  | Hypothetical protein                                                                  |                |                |
| ORF6                                              | 2,556  | 2,693  | 36.2 | 45  | Lactococcin family bacteriocin, <i>L. lactis</i>                                      | 30/45 (68%)    | WP_021214958.1 |
| ORF7                                              | 2,706  | 3,416  | 25.7 | 236 | CPBP family intramembrane metalloprotease, <i>Lactococcus</i>                         | 186/236 (79%)  | WP_058208202.1 |
| ORF8                                              | 5,584  | 3,542  | 30.2 | 680 | MobA/MobL family protein, <i>L. lactis</i>                                            | 676/680 (99%)  | WP_010890626.1 |
| ORF9                                              | 5,853  | 6,137  | 21.4 | 94  | Hypothetical protein, <i>L. lactis</i>                                                | 94/94 (100%)   | WP_052206610.1 |
| ORF10                                             | 6,150  | 6,416  | 19.4 | 88  | Hypothetical protein, <i>L. lactis</i>                                                | 88/88 (100%)   | WP_058218801.1 |
| ORF11                                             | 6,905  | 6,705  | 18.9 | 66  | Hypothetical protein, <i>L. lactis</i>                                                | 65/66 (98%)    | WP_058147838.1 |
| ORF12                                             | 7,236  | 6,918  | 31.7 | 105 | Hypothetical protein, <i>Lactococcus petauri</i>                                      | 100/105(95%)   |                |
| ORF13                                             | 7,496  | 7,347  | 37.3 | 49  | Hypothetical protein                                                                  |                |                |
| ORF14                                             | 8,883  | 7,714  | 34.1 | 389 | RepB family plasmid replication initiator protein, <i>L. lactis</i>                   | 389/389 (100%) | WP_058218799.1 |
| ORF15                                             | 10,499 | 9,555  | 28.8 | 314 | Toprim domain-containing (ribonuclease-like) protein, <i>L. lactis</i>                | 314/314 (100%) | WP_011997519.1 |
| ORF16                                             | 10,905 | 10,525 | 30.4 | 126 | Single-stranded DNA-binding protein, <i>Lactococcus</i>                               | 126/126 (100%) | WP_010890681.1 |
| ORF17                                             | 11,285 | 10,920 | 28.6 | 121 | Hypothetical protein, <i>Lactococcus</i>                                              | 121/121 (100%) | WP_011997518.1 |
| ORF18                                             | 11,652 | 11,353 | 27.6 | 99  | Hypothetical protein, <i>Lactococcus</i>                                              | 99/99 (100%)   | WP_011997517.1 |
| ORF19                                             | 12,422 | 11,655 | 27.8 | 255 | ParA family protein, <i>L. lactis</i>                                                 | 255/255 (100%) | WP_011997516.1 |
| ORF20                                             | 13,082 | 12,510 | 28.9 | 190 | Recombinase family protein, <i>Lactococcus hircilactis</i>                            | 190/190 (100%) | WP_153497015.1 |
| ORF21                                             | 13,281 | 13,523 | 27.1 | 80  | Helix-turn-helix transcriptional regulator, <i>L. lactis</i>                          | 80/80 (100%)   | WP_101944591.1 |
| ORF22                                             | 13,510 | 13,917 | 33.0 | 135 | ATP-dependent helicase, <i>Listeria monocytogenes</i>                                 | 116/128 (96%)  | EAD8123299.1   |
| ORF23                                             | 14,082 | 14,234 | 30.7 | 50  | Hypothetical protein                                                                  |                |                |
| ORF24                                             | 14,244 | 14,513 | 30.0 | 89  | Hypothetical protein, <i>Enterococcus faecalis</i>                                    | 88/89 (99%)    | AEF32547.1     |
| ORF25                                             | 14,515 | 14,694 | 36.6 | 59  | Hypothetical protein, <i>L. lactis</i>                                                | 58/59 (98%)    | ARE12296.1     |
| ORF26                                             | 15,434 | 14,748 | 37.4 | 228 | IS6-like element IS1216 family transposase, Bacteria                                  | 228/228 (100%) | WP_002354485.1 |
| ΔORF27                                            | 15,499 | 15,786 | 32.9 | 95  | Replication protein RepB, partial, <i>Enterococcus faecium</i>                        | 95/125 (100%)  | WP_002328826.1 |
| ORF28                                             | 16,243 | 16,401 | 27.6 | 52  | Hypothetical protein                                                                  |                |                |
| ORF29                                             | 16,633 | 16,454 | 33.8 | 59  | Hypothetical protein                                                                  |                |                |
| ORF30                                             | 16,916 | 17,863 | 32.1 | 315 | Replication initiation factor domain-containing protein, <i>Staphylococcus aureus</i> | 293/314 (93%)  | WP_031915289.1 |
| ORF31                                             | 17,871 | 18,719 | 24.7 | 282 | Streptomycin adenyltransferase Str, Bacteria                                          | 282/282 (100%) | WP_010711054.1 |



|                                                           |        |        |      |     |                                                                                          |                |                |
|-----------------------------------------------------------|--------|--------|------|-----|------------------------------------------------------------------------------------------|----------------|----------------|
| ORF32                                                     | 19,026 | 19,310 | 27.3 | 94  | Replication initiation protein, <i>Enterococcus</i>                                      | 94/94 (100%)   | WP_002328825.1 |
| ORF33                                                     | 19,445 | 20,092 | 24.0 | 215 | Type A-8 chloramphenicol <i>O</i> -acetyltransferase, Lactobacillales                    | 215/215 (100%) | WP_002403315.1 |
| ORF34                                                     | 20,345 | 21,556 | 34.8 | 403 | Plasmid recombination protein, Lactobacillales                                           | 403/403 (100%) | WP_002328823.1 |
| ORF35                                                     | 22,100 | 22,255 | 29.4 | 51  | Protein RepA, partial, Bacteria                                                          | 50/51 (98%)    | WP_002328822.1 |
| ΔORF36                                                    | 22,379 | 22,762 | 34.7 | 121 | Replication protein RepB, <i>Enterococcus</i>                                            | 121/181 (100%) | WP_100970614.1 |
| ORF37                                                     | 23,482 | 22,796 | 37.4 | 228 | IS6-like element, IS/216 family transposase, Bacteria                                    | 228/228 (100%) | WP_002354485.1 |
| ΔORF38                                                    | 23,560 | 23,763 | 27.9 | 67  | Conjugal transfer protein, Lactobacillales                                               | 67/305 (100%)  | WP_002405436.1 |
| ORF39                                                     | 24,592 | 26,532 | 33.3 | 646 | Tetracycline resistance ribosomal protection protein Tet(S), <i>Enterococcus faecium</i> | 646/646 (100%) | ABB97394.1     |
| ORF40                                                     | 27,657 | 27,301 | 36.1 | 119 | Helix-turn-helix domain-containing protein/Tn916, transcriptional regulator, Bacilli     | 118/119 (100%) | WP_002405438.1 |
| ORF41                                                     | 27,755 | 27,907 | 30.7 | 50  | Hypothetical protein                                                                     | 88/89 (99%)    |                |
| ORF42                                                     | 27,917 | 28,186 | 30.0 | 89  | Hypothetical protein, <i>E. faecalis</i>                                                 | 88/89 (99%)    | AEF32547.1     |
| ORF43                                                     | 28,188 | 28,367 | 36.6 | 59  | Hypothetical protein, <i>L. lactis</i>                                                   | 58/59 (98%)    | ARE12296.1     |
| ORF44                                                     | 29,140 | 28,421 | 36.8 | 239 | IS6-like element, IS/216 family transposase, <i>L. lactis</i>                            | 239/239 (100%) | WP_060416618.1 |
| ORF45                                                     | 29,632 | 30,542 | 28.1 | 303 | MarR family transcriptional regulator, <i>Lactococcus</i>                                | 302/303 (99%)  | WP_060416617.1 |
| ORF46                                                     | 31,010 | 30,843 | 23.2 | 55  | Hypothetical protein                                                                     |                |                |
| <b>pTC6.1 from <i>Lacticaseibacillus casei</i> LB23</b>   |        |        |      |     |                                                                                          |                |                |
| ORF1                                                      | 999    | 1,856  | 38.3 | 285 | Replication protein, <i>Lactiplantibacillus plantarum</i>                                | 285/319 (100%) | WP_011222005.1 |
| <b>pTC6.2 from <i>Lacticaseibacillus casei</i> LB23</b>   |        |        |      |     |                                                                                          |                |                |
| ORF1                                                      | 168    | 329    | 51.8 | 53  | Hypothetical protein, <i>Schleiferilactobacillus perolens</i>                            | 53/53 (100%)   | KRL07062.1     |
| ORF2                                                      | 580    | 738    | 30.2 | 52  | Ribbon-helix-helix protein (RepC), CopG family, Bacilli                                  | 52/52 (100%)   | WP_011222011.1 |
| ORF3                                                      | 805    | 1,464  | 37.8 | 219 | Replication protein (RepB), <i>Lactiplantibacillus plantarum</i>                         | 219/219 (100%) | WP_011222008.1 |
| ORF4                                                      | 2,066  | 1,656  | 27.4 | 136 | Hypothetical protein, <i>L. plantarum</i>                                                | 136/148 (100%) | WP_011222009.1 |
| <b>pTC7 from <i>Lactiplantibacillus plantarum</i> NC8</b> |        |        |      |     |                                                                                          |                |                |
| ORF1                                                      | 246    | 100    | 34.0 | 48  | ABC transporter ATP-binding protein, <i>Lactiplantibacillus plantarum</i>                | 48/48(98%)     | PHV52299.1     |
| ORF2                                                      | 345    | 1,046  | 42.4 | 233 | Transposase- IS30-like element ISLpl1, <i>L. plantarum</i>                               | 232/233 (99%)  | AAM61874.1     |
| ORF3                                                      | 1,224  | 1,670  | 37.4 | 125 | Hypothetical protein, <i>L. plantarum</i>                                                | 125/125 (99%)  | MBA2820843.1   |
| ORF4                                                      | 1,793  | 1,993  | 40.3 | 66  | Cold-shock protein, Bacilli                                                              | 66/66 (100%)   | WP_003643340.1 |
| ORF5                                                      | 2,080  | 2,322  | 37.9 | 80  | Hypothetical protein, <i>Lactobacillaceae</i>                                            | 80/80 (100%)   | WP_003643341.1 |
| ORF6                                                      | 2,930  | 3,490  | 38.5 | 186 | DUF536 domain-containing protein, Bacilli                                                | 186/186 (100%) | WP_003643342.1 |
| ORF7                                                      | 3,492  | 3,671  | 31.1 | 59  | Hypothetical protein, <i>Lactiplantibacillus pentosus</i>                                | 59/59 (100%)   | RMW46525.1     |
| ORF8                                                      | 4,517  | 4,705  | 32.8 | 62  | Hypothetical protein                                                                     |                |                |

|                                                    |        |        |      |     |                                                                                      |                |                |
|----------------------------------------------------|--------|--------|------|-----|--------------------------------------------------------------------------------------|----------------|----------------|
| ORF9                                               | 4,822  | 4,670  | 34.0 | 51  | Hypothetical protein, <i>L. plantarum</i> subsp. <i>plantarum</i>                    | 51/59 (100%)   | EFK30800.1     |
| ORF10                                              | 6,692  | 5,898  | 36.7 | 264 | Tyrosine recombinase/integrase, <i>L. plantarum</i> subsp. <i>plantarum</i>          | 264/264 (100%) | KRL32889.1     |
| ORF11                                              | 6,490  | 6,834  | 34.2 | 114 | PemI, <i>Weissella cibaria</i>                                                       | 114/114 (99%)  | AUG89724.1     |
| ORF12                                              | 6,828  | 7,172  | 36.2 | 114 | PemK, <i>L. plantarum</i>                                                            | 114/114 (100%) | WP_071543014.1 |
| <b>pEMR1 from <i>Lactococcus lactis</i> NZ9000</b> |        |        |      |     |                                                                                      |                |                |
| ORF1                                               | 47,107 | 907    | 28.2 | 314 | Toprim domain-containing protein, <i>Lactococcus lactis</i>                          | 314/314 (100%) | WP_011997519.1 |
| ORF2                                               | 1,579  | 2,748  | 34.2 | 389 | RepB family plasmid replication initiator protein, <i>L. lactis</i>                  | 389/389 (100%) | WP_058218799.1 |
| ORF3                                               | 3,181  | 3,543  | 29.7 | 120 | Hypothetical protein                                                                 |                |                |
| ORF4                                               | 3,863  | 3,594  | 23.7 | 89  | Hypothetical protein                                                                 |                |                |
| ORF5                                               | 4,312  | 4,046  | 19.5 | 88  | Hypothetical protein, <i>L. lactis</i>                                               | 88/88 (100%)   | WP_058218801.1 |
| ORF6                                               | 4,609  | 4,325  | 21.4 | 94  | Hypothetical protein, <i>Lactococcus</i>                                             | 94/94 (100%)   | WP_052206610.1 |
| ORF7                                               | 4,878  | 6,920  | 30.3 | 680 | MobA/MobL family protein, <i>Lactococcus hircilactis</i>                             | 680/680 (99%)  | WP_153497008.1 |
| ORF8                                               | 7,109  | 7,348  | 33.3 | 79  | Hypothetical protein                                                                 |                |                |
| ORF9                                               | 7,349  | 7,954  | 27.3 | 201 | Hypothetical protein, <i>Lactococcus</i>                                             | 201/201 (100%) | WP_010890663.1 |
| ORF10                                              | 7,967  | 8,311  | 42.9 | 114 | Protein TrsB, <i>Lactococcus</i>                                                     | 114/114 (100%) | WP_010890627.1 |
| ORF11                                              | 8,332  | 8,679  | 25.8 | 115 | Protein TrsC, <i>Lactococcus</i>                                                     | 115/115 (100%) | WP_010890628.1 |
| ORF12                                              | 8,663  | 9,316  | 29.1 | 217 | Conjugal transfer protein, <i>Lactococcus</i>                                        | 204/217 (100%) | WP_153497006.1 |
| ORF13                                              | 9,328  | 11,346 | 31.4 | 672 | Protein TrsE, <i>Lactococcus</i>                                                     | 672/672 (99%)  | WP_058218807.1 |
| ORF14                                              | 11,339 | 12,757 | 28.0 | 472 | Conjugal transfer protein, <i>L. lactis</i>                                          | 472/472 (99%)  | WP_195928101.1 |
| ORF15                                              | 12,750 | 13,916 | 35.7 | 385 | C40 family peptidase, <i>L. hircilactis</i>                                          | 385/385 (100%) | WP_153497003.1 |
| ORF16                                              | 13,929 | 14,546 | 26.2 | 205 | Hypothetical protein, <i>Lactococcus petauri</i>                                     | 205/205 (100%) | WP_165707211.1 |
| ORF17                                              | 14,533 | 14,904 | 23.3 | 122 | Hypothetical protein (Thioredoxin), <i>Lactococcus</i>                               | 122/122 (100%) | WP_021166219.1 |
| ORF18                                              | 14,901 | 15,359 | 29.9 | 152 | Conjugal transfer protein TrsJ, <i>Lactococcus</i>                                   | 152/152 (100%) | WP_010890634.1 |
| ORF19                                              | 15,356 | 16,987 | 31.2 | 543 | Type IV secretory system conjugative DNA transfer family protein, <i>Lactococcus</i> | 543/543 (100%) | WP_153497001.1 |
| ORF20                                              | 17,002 | 17,397 | 27.0 | 131 | Hypothetical protein                                                                 |                |                |
| ORF21                                              | 17,412 | 18,248 | 31.5 | 278 | Conjugal transfer protein TrsL, <i>Lactococcus</i>                                   | 278/278 (100%) | WP_021166217.1 |
| ORF22                                              | 18,264 | 20,441 | 28.1 | 725 | DNA topoisomerase III, <i>L. petauri</i>                                             | 725/725 (99%)  | WP_165707213.1 |
| ORF23                                              | 20,444 | 20,653 | 29.6 | 69  | Hypothetical protein, <i>Lactococcus</i>                                             | 69/69 (100%)   | WP_010890684.1 |
| ORF24                                              | 20,656 | 21,723 | 28.6 | 355 | Hypothetical protein, <i>Lactococcus</i>                                             | 355/355 (99%)  | WP_143459739.1 |
| ORF25                                              | 22,971 | 22,252 | 28.4 | 239 | Hypothetical protein                                                                 | 239/239 (100%) | ARW71132.1     |
| ORF26                                              | 23,654 | 24,373 | 37.0 | 239 | IS6-like element IS1216 family transposase, <i>L. lactis</i>                         | 239/239 (99%)  | WP_060416618.1 |
| ORF27                                              | 24,657 | 24,427 | 37.7 | 76  | Hypothetical protein, <i>Staphylococcaceae</i>                                       | 76/76 (100%)   | WP_011997529.1 |
| ORF28                                              | 25,134 | 25,493 | 36.1 | 119 | Helix-turn-helix domain-containing protein, Bacilli                                  | 119/119 (100%) | WP_002405438.1 |



|        |        |        |      |     |                                                                                          |                |                |
|--------|--------|--------|------|-----|------------------------------------------------------------------------------------------|----------------|----------------|
| ORF29  | 28,202 | 26,262 | 33.3 | 646 | Tetracycline resistance ribosomal protection protein Tet(S), <i>Enterococcus faecium</i> | 646/646 (100%) | ABB97394.1     |
| ORF30  | 29,234 | 29,031 | 28.0 | 67  | Conjugal transfer protein, <i>Staphylococcaceae</i>                                      | 67/67 (100%)   | WP_017370349.1 |
| ORF31  | 29,312 | 29,998 | 37.4 | 228 | IS6-like element IS1216 family transposase, <i>Enterococcus faecium</i>                  | 228/228 (99%)  | PQG28801.1     |
| ORF32  | 30,200 | 30,021 | 28.3 | 59  | rRNA adenine methyltransferase, <i>E. faecium</i>                                        | 59/59(93%)     | WP_181046556.1 |
| ORF33  | 30,882 | 30,145 | 33.1 | 245 | 23S rRNA (adenine(2058)-N(6))-methyltransferase Erm(B), Bacteria                         | 245/245 (100%) | WP_001038795.1 |
| ORF34  | 31,378 | 31,141 | 34.2 | 79  | Peptide-binding protein, Bacteria                                                        | 79/79 (99%)    | WP_000635249.1 |
| ORF35  | 31,607 | 32,293 | 39.1 | 228 | Transposase, <i>L. lactis</i> subsp. <i>lactis</i> bv. <i>diacetylactis</i>              | 228/228 (99%)  | AEK97256.1     |
| ORF36  | 32,626 | 32,471 | 26.3 | 51  | Hypothetical protein                                                                     |                |                |
| ORF37  | 33,109 | 32,933 | 26.9 | 58  | Hypothetical protein                                                                     |                |                |
| ORF38  | 33,058 | 33,942 | 37.0 | 294 | Virginiamycin B lyase, <i>Streptococcus gallolyticus</i>                                 | 294/294 (92%)  | WP_039692849.1 |
| ORF39  | 34,000 | 34,605 | 33.1 | 201 | Vat family streptogramin A O-acetyltransferase, <i>S.gallolyticus</i>                    | 201/215 (94%)  | WP_039692847.1 |
| ORF40  | 35,042 | 35,491 | 31.8 | 149 | Hypothetical protein, <i>Alkalibaculum bacchi</i>                                        | 149/149 (92%)  | WP_113921140.1 |
| ΔORF41 | 35,504 | 35,701 | 33.3 | 65  | Nucleotidyltransferase domain-containing protein, <i>Halanaerobiaceae bacterium</i>      | 55/284 (64%)   | NLM97131.1     |
| ΔORF42 | 36,054 | 37,100 | 32.1 | 348 | Antirestriction protein ArdA, <i>Tissierella pigra</i>                                   | 339/521 (93%)  | WP_195838003.1 |
| ORF43  | 37,251 | 37,793 | 31.3 | 180 | Tunicamycin resistance protein, <i>Clostridium</i> sp.                                   | 178/195 (88%)  | QAA32198.1     |
| ΔORF44 | 38,919 | 38,401 | 33.7 | 172 | IS110 family transposase, Clostridiales bacterium                                        | 128/387 (97%)  | HGX61363.1     |
| ORF45  | 39,430 | 40,022 | 39.4 | 197 | Phosphotransferase, Bacilli                                                              | 197/197 (88%)  | WP_101031675.1 |
| ORF46  | 40,121 | 40,972 | 37.9 | 283 | Aminoglycoside 6-adenylyltransferase (ANT(6)-Ia), <i>Campylobacter jejuni</i>            | 283/302 (88%)  | EDP8307115.1   |
| ΔORF47 | 41,380 | 42,159 | 42.3 | 259 | PTS sugar transporter subunit IIC, <i>Latilactobacillus curvatus</i>                     | 249/430 (99%)  | WP_148484706.1 |
| ORF48  | 42,196 | 42,876 | 38.4 | 226 | IS6 family transposase, <i>E. faecium</i>                                                | 226/226 (100%) | WP_060811670.1 |
| ORF49  | 43,850 | 42,906 | 31.6 | 315 | Hypothetical protein                                                                     |                |                |
| ORF50  | 44,081 | 44,425 | 29.9 | 114 | Hypothetical protein                                                                     |                |                |
| ORF51  | 44,533 | 45,105 | 29.0 | 190 | Recombinase family protein, <i>L. hircilactis</i>                                        | 190/190 (100%) | WP_153497015.1 |
| ORF52  | 45,193 | 45,960 | 27.9 | 255 | ParA family protein, <i>L. lactis</i>                                                    | 255/255 (100%) | WP_011997516.1 |
| ORF53  | 45,963 | 46,262 | 27.7 | 99  | Hypothetical protein, <i>Lactococcus</i>                                                 | 99/99 (100%)   | WP_011997517.1 |
| ORF54  | 46,330 | 46,695 | 28.6 | 121 | Hypothetical protein, <i>L. hircilactis</i>                                              | 121/121 (100%) | WP_011997518.1 |
| ORF55  | 46,710 | 47,090 | 30.4 | 126 | Single-stranded DNA-binding protein, <i>Lactococcus</i>                                  | 126/126 (100%) | WP_010890681.1 |

<sup>a</sup>Including start and stop codons.

<sup>b</sup>Average G+C content of pTC1 (33.8%), pTC2 (34.3%), TC3 (32.6%), pTC4 (31.7%), pTC5 (30.6%), pTC6.1 (34.3%), pTC6.2 (39.5%), pTC7 (36.8%), and pERM1 (31.0%).

<sup>c</sup>aa, amino acids.

**Table S2.-** Primers and PCR conditions utilized in this study, as well as amplicon size expected of the tetracycline and erythromycin resistance genes targeted.

| Primers   | Sequence                   | Gene target   | Annealing temperature (°C) | Amplicon size (bp) | Reference |
|-----------|----------------------------|---------------|----------------------------|--------------------|-----------|
| DI        | GAYACICCCIGGICAYRTIGAYTT   | RPP*          | 50                         | 1,083              | 82        |
| DII       | GCCCARWAIGGRTTIGGIGGIACYTC |               |                            |                    |           |
| Tet-1     | GATCGACCAGGCTGGCGTTG       | RPP           | 50                         | 1,300              | 83        |
| Tet-2     | GGCTGATTGGTTCTCCTGCG       |               |                            |                    |           |
| tetW      | AAGCGGCAGTCACTTCCTTCC      | <i>tet(W)</i> | 50                         | 1,200              | 84        |
| Tet-2     | GGCTGATTGGTTCTCCTGCG       |               |                            |                    |           |
| DI        | GAYACICCCIGGICAYRTIGAYTT   | <i>tet(M)</i> | 55                         | 1,513              | 85        |
| TetM-R    | CACCGAGCAGGGATTTCTCCAC     |               |                            |                    |           |
| TetS-FWT1 | ATCAAGATATTAAGGAC'         | <i>tet(S)</i> | 45                         | 573                | 85        |
| TetS-RVT2 | TTCTCTATGTGGTAATC          |               |                            |                    |           |
| TetO-FW1  | AATGAAGATTCCGACAATTT       | <i>tet(O)</i> | 45                         | 781                | 85        |
| TetO-RV1  | CTCATGCGTTGTAGTATTCCA      |               |                            |                    |           |
| TetK-FW1  | TTATGGTGGTTGTAGCTAGAAA     | <i>tet(K)</i> | 45                         | 348                | 85        |
| TetK-RV1  | AAAGGGTTAGAACTCTTGAAA      |               |                            |                    |           |
| TetL-FW3  | GTMGTTGCGCGCTATATTCC       | <i>tet(L)</i> | 45                         | 696                | 85        |
| TetL-RV3  | GTGAAMGRWAGCCCACCTAA       |               |                            |                    |           |
| erm(A)-1  | TCTAAAAAGCATGTAAAAGAA      | <i>ermA</i>   | 48                         | 645                | 86        |
| erm(A)-2  | CTTCGATAGTTTATTAATATTAGT   |               |                            |                    |           |
| ermB-1    | CATTTAACGACGAAACTGGC       | <i>ermB</i>   | 50                         | 639                | 86        |
| ermB-2    | GGAACATCTGTGGTATGGCG       |               |                            |                    |           |
| erm(C)-1  | TCAAAACATAATATAGATAAA      | <i>ermC</i>   | 43                         | 642                | 86        |
| erm(C)-2  | GCTAATATTGTTTAAATCGTCAAT   |               |                            |                    |           |
| erm(F)-1  | CGGGTCAGCACTTTACTATTG      | <i>ermF</i>   | 50                         | 466                | 87        |
| erm(F)-2  | GGACCTACCTCATAGACAAG       |               |                            |                    |           |
| mef(A)-1  | ACCGATTCTATCAGCAAAG        | <i>mefA</i>   | 43                         | 940                | 88        |
| mef(A)-2  | GGACCTGCCATTGGTGTG         |               |                            |                    |           |

\*RPP, genes encoding ribosomal protection proteins.
